# Supplementary material
Source: publisher site journal article supplement (https://www.dovepress.com/get_supplementary_file.php?f=479564.docx)

**Supplementary Materials**

# Effectiveness of PK-guided personalized recombinant FVIII treatment in patients with hemophilia A: Clinical case experiences based on an observational study

Yoko Mizoguchi1

Moeko Hino2

Hitoshi Ueda3

Yasuo Miyaguchi3

Masao Kobayashi1,4

1Department of Pediatrics, Hiroshima University Graduate School of Biomedical Sciences, Hiroshima, Japan; 2Department of Pediatrics, Chiba University Hospital, Chiba, Japan; 3Japan Medical Office, Takeda Pharmaceutical Company Limited, Tokyo, Japan; 4Japanese Red Cross, Chugoku-Shikoku Block Blood Center, Hiroshima, Japan

Correspondence: Yasuo Miyaguchi

Japan Medical Office, Takeda Pharmaceutical Company Limited

2 Chome-1-1 Nihonbashihoncho, Chuo-ku

Tokyo, 103-0023, Japan

Tel (optional) +81 070-4921-7966

Email [yasuo.miyaguchi1@takeda.com](mailto:yasuo.miyaguchi1@takeda.com)

**List of Tables and Figures**

**Supplementary Figure 1**

**Supplementary Figure 2**

**Supplementary Figure 1** Study design overview. Star indicates PK simulation with myPKFit.

**Abbreviations:** ICF, informed consent form; PK, pharmacokinetic.


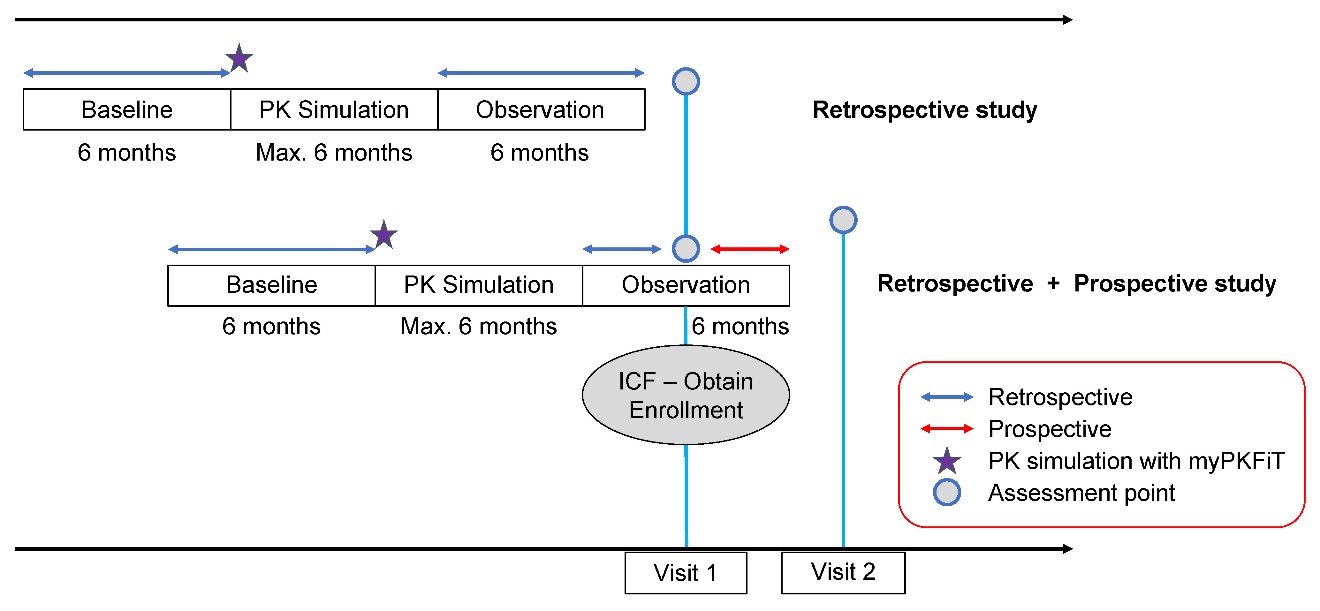


**Supplementary Figure 2** Quality of life per individual patient assessed by the SF-36 for patients aged <8 years (**A**, **B**, **C**, **D**, **E**, **F**, **G**, **H**) and patients aged ≥16 years (**I**, **J**, **K**, **L**, **M**, **N**, **O**, **P**) or by the KIDSCREEN-27 form for patients aged ≥8 years and <16 years (**Q**, **R**, **S**, **T**, **U**).

**Abbreviations:** BP, bodily pain; GH, general health; MH, mental health; PF, physical functioning; RE, role-emotional; RP, role-physical; SF, social functioning; SF-36, 36-Item Short Form Survey; VT, vitality.


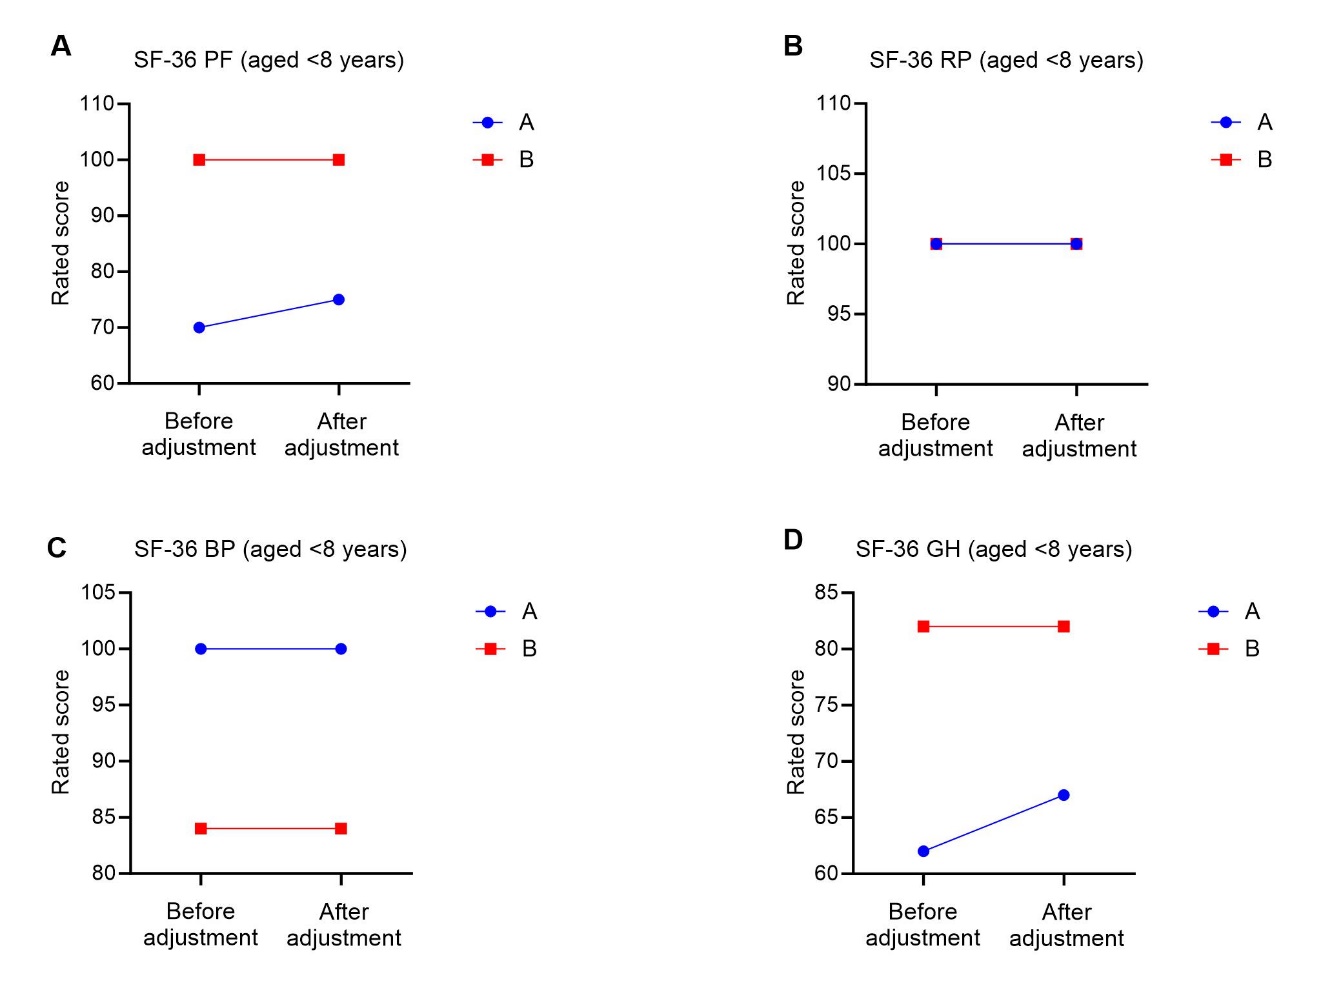

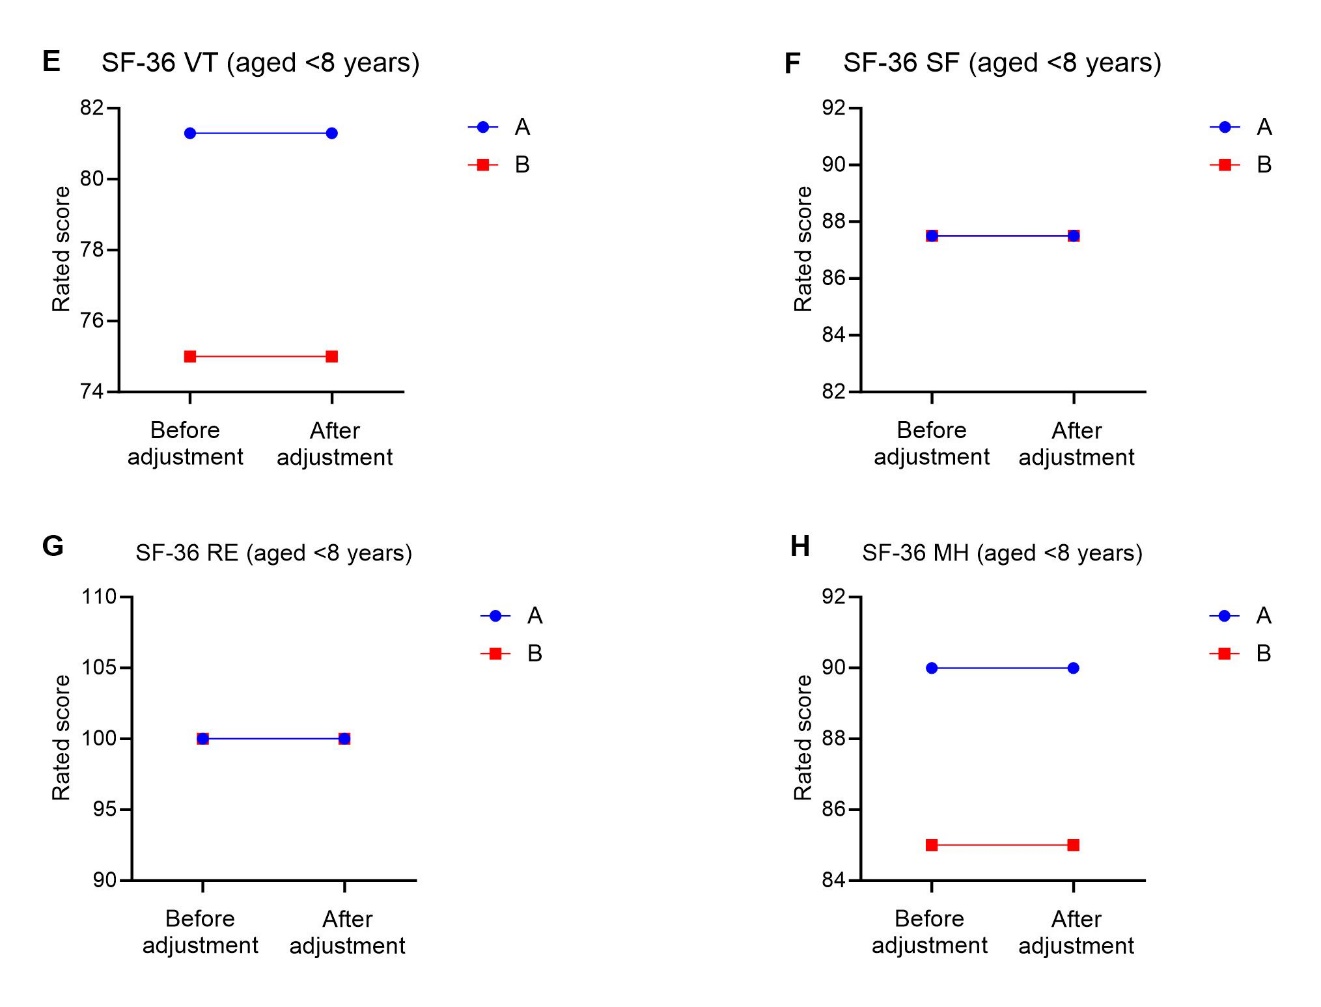


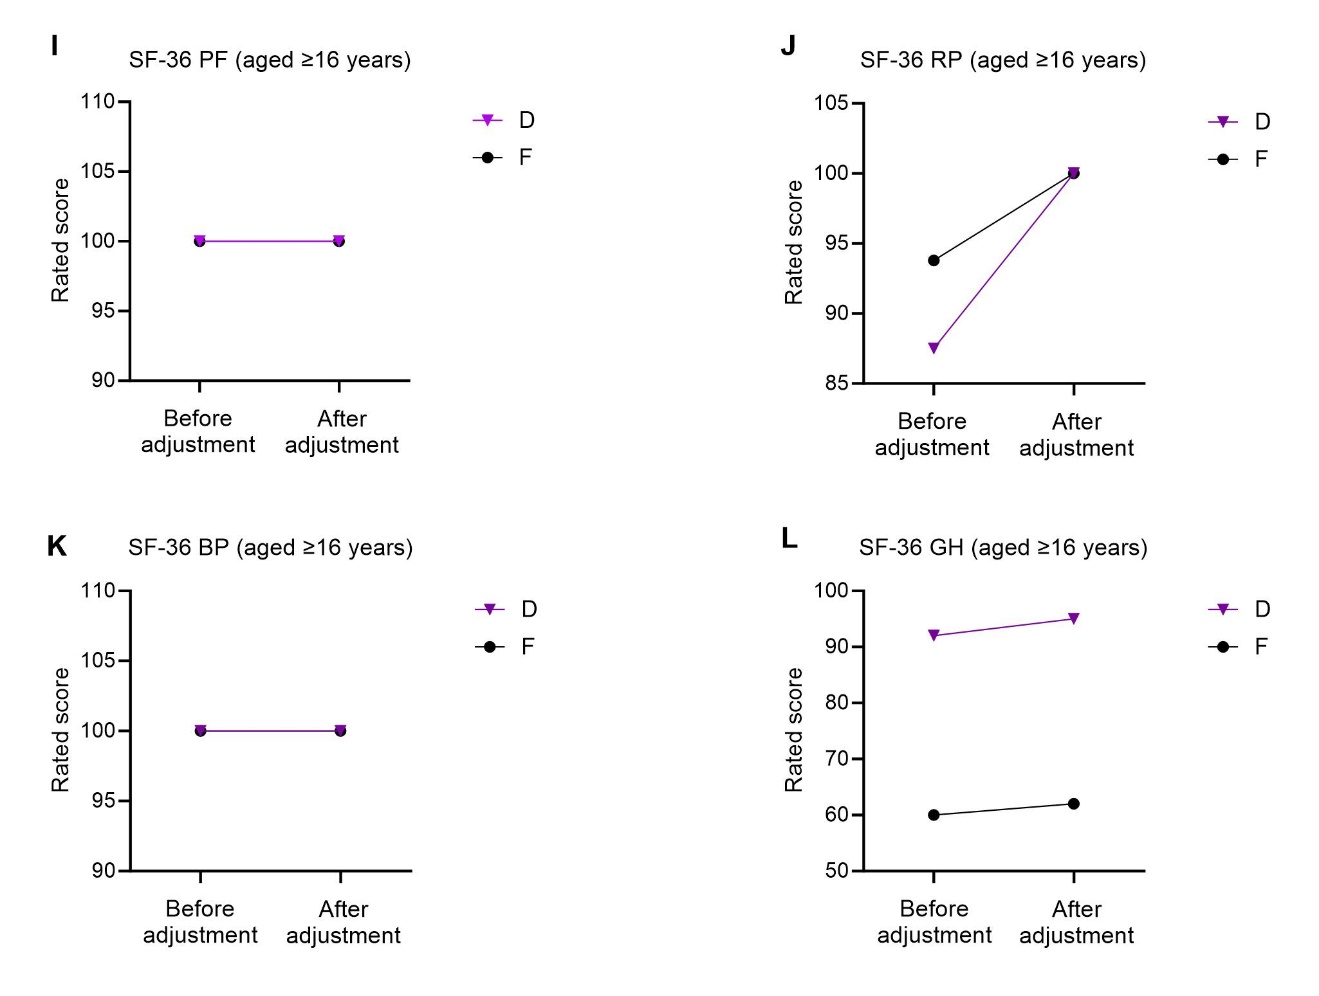


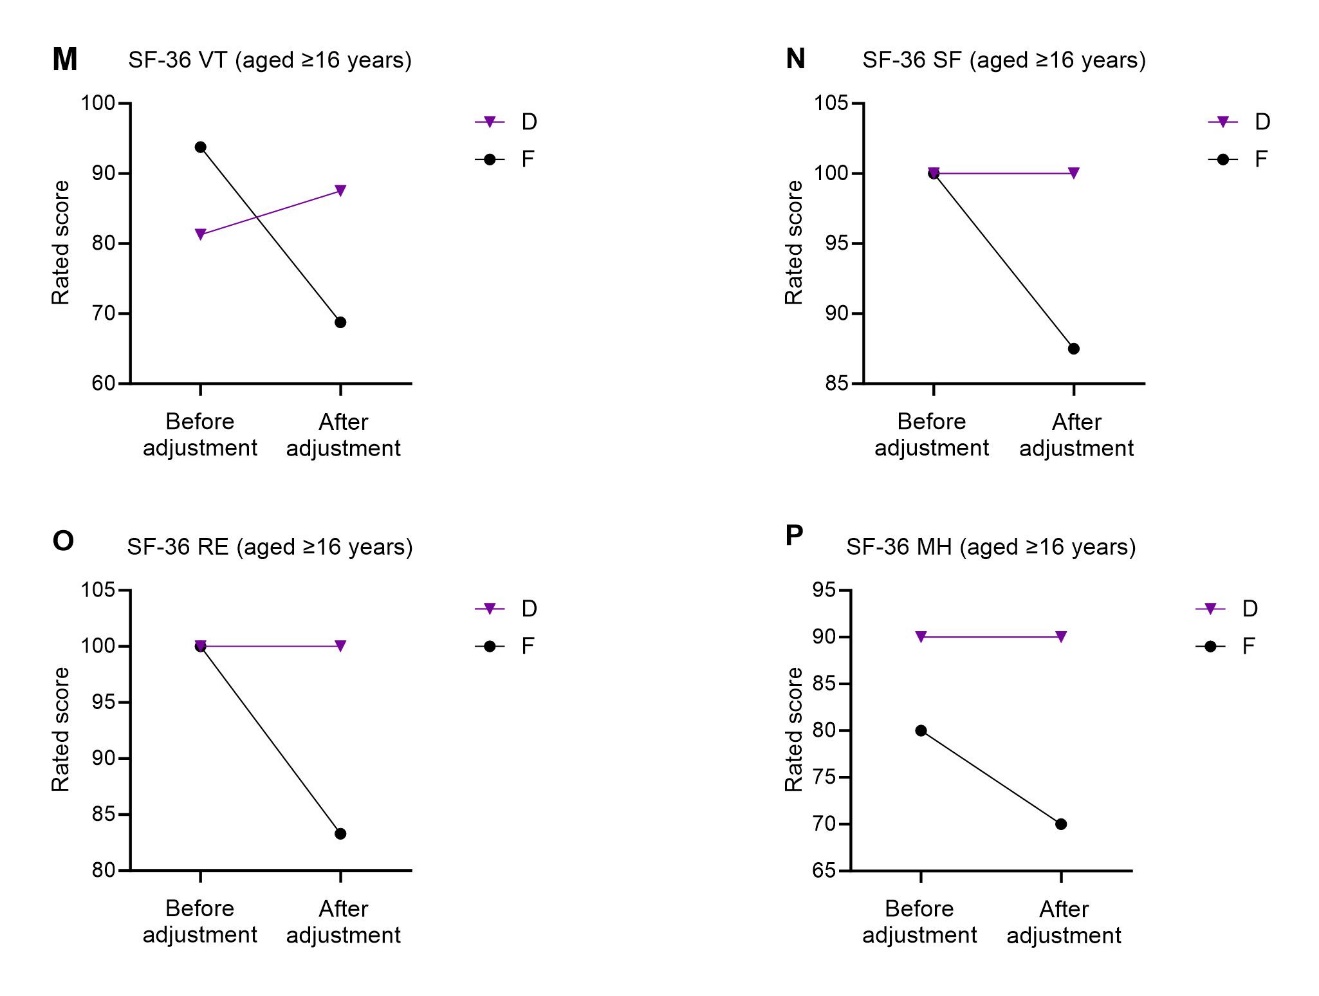


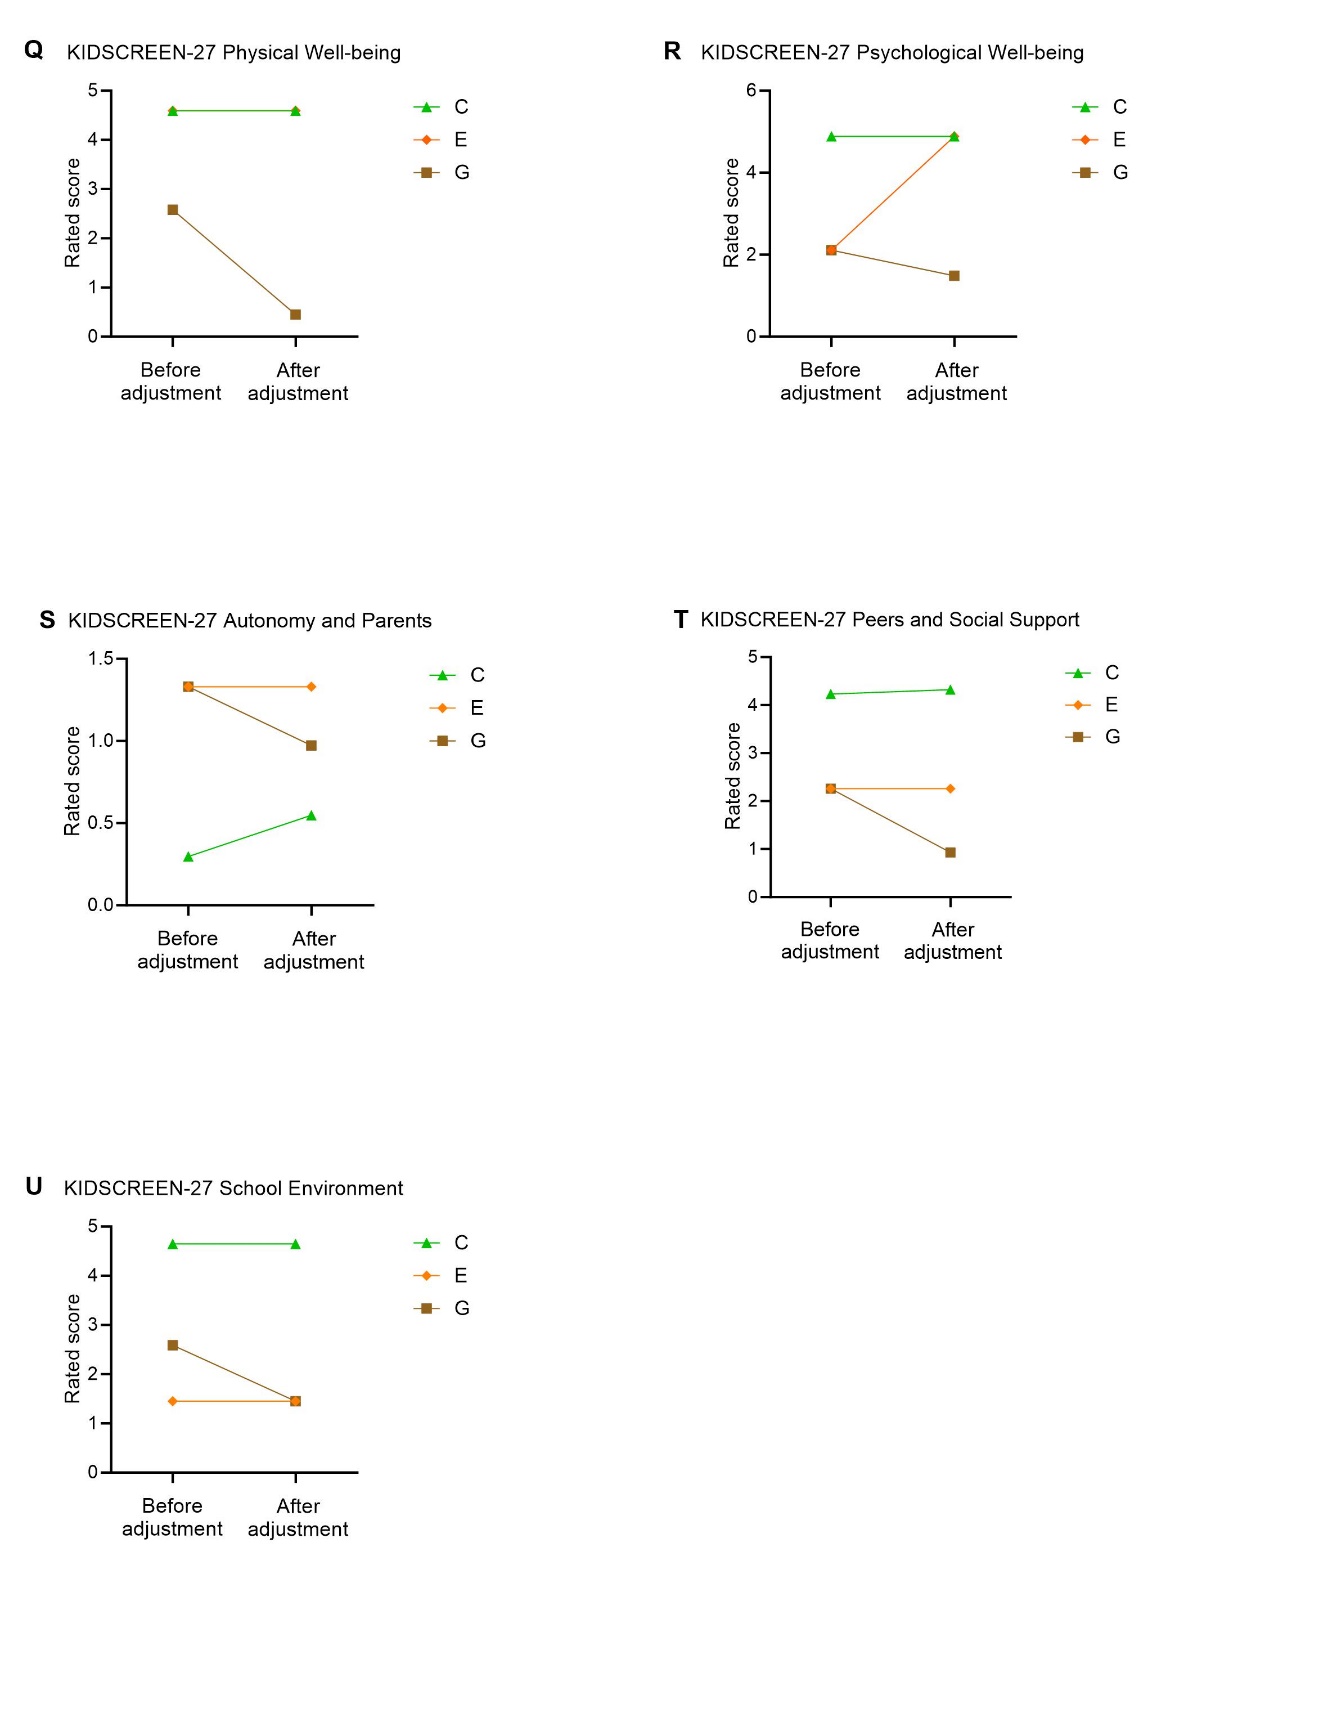

Supplement: Supplementary file 1 [file get_supplementary_file.php]
